# Supplementary material for: Tunable magnetic and half-metallic properties of the two-dimensional electron gas in LaAlO3/SrTiO3(111) heterostructures
Source: Royal Society of Chemistry journal article supplement (doi:10.1039/c9cp00746f), 2019-01-01
Supplement: c9cp00746f1.pdf [file c9cp00746f1.pdf]

## SUPPLEMENTARY INFORMATION

### Tunable Magnetic and Half-metallic Properties of the Two-dimensional Electron Gas in LaAlO<sub>3</sub>/SrTiO<sub>3</sub> (111) Heterostructures

Yan-ling Du,<sup>1</sup> Hong-xia Bu,<sup>2</sup> Cheng-jie Ji,<sup>1</sup> Xin-miao Zhang<sup>3</sup>, Cheng-lin Li<sup>1</sup> and Xiao-nan Fang<sup>\*4</sup>

---

<sup>1</sup> College of Science and Technology, Shandong University of Traditional Chinese Medicine, Jinan 250355, China

<sup>2</sup> College of Physics and Electronic Engineering, Qilu Normal University, Jinan 250200, China

<sup>3</sup> School of Physics, Shandong University, Jinan 250100, China

\* E-mail address of corresponding author: franknan@126.com

<sup>4</sup> Key Laboratory of TCM Data Cloud Service in Universities of Shandong, Shandong Management University, Jinan 250355, China

LAOSTO  
1.0000000000000000  
4.8931789300000000 0.0000000000000000 0.0000000000000000  
-2.4465894600000000 4.2376172600000000 0.0000000000000000  
0.0000000000000000 0.0000000000000000 20.1003197752325065  
O Al Ti Sr La  
27 6 3 2 7  
Direct  
-0.6666666666666672 -0.8333333333333334 -0.8728554638382802  
-0.0000000000000003 -0.4999999999999999 -0.6546415978787111  
-0.6666666666666667 -0.8333333333333335 -0.5455346648989262  
0.0000000000000004 -0.4999999999999996 -0.3273207989393573  
-0.6666666666666670 -0.8333333333333335 -0.2182138659595722  
0.0000000000000007 -0.4999999999999996 -0.0000000000000035  
0.8333333333333332 0.1666666666666665 -0.8728554638382802  
0.4999999999999998 0.4999999999999998 -0.6546415978787111  
0.8333333333333332 0.1666666666666667 -0.5455346648989262  
0.4999999999999995 0.5000000000000001 -0.3273207989393573  
0.8333333333333334 0.1666666666666666 -0.2182138659595722  
0.4999999999999996 0.5000000000000003 -0.0000000000000035  
-0.1666666666666667 0.6666666666666669 -0.8728554638382802  
-0.4999999999999998 0.0000000000000001 -0.6546415978787111  
-0.1666666666666670 0.6666666666666664 -0.5455346648989262  
-0.5000000000000001 -0.0000000000000005 -0.3273207989393573  
-0.1666666666666667 0.6666666666666667 -0.2182138659595722  
-0.5000000000000003 -0.0000000000000007 -0.0000000000000035  
-0.3333333333333333 -1.1666666666666663 -0.7637485308584951  
-0.3333333333333334 -1.1666666666666663 -0.4364277319191412  
-0.3333333333333330 -1.1666666666666663 -0.1091069329797873  
1.1666666666666663 0.8333333333333333 -0.7637485308584951  
1.1666666666666663 0.8333333333333333 -0.4364277319191412  
1.1666666666666663 0.8333333333333334 -0.1091069329797873  
-0.8333333333333335 0.3333333333333330 -0.7637485308584951  
-0.8333333333333335 0.3333333333333333 -0.4364277319191413  
-0.8333333333333334 0.3333333333333329 -0.1091069329797873  
-0.3333333333333339 -0.6666666666666666 -0.9274089303281725  
-0.3333333333333335 -0.6666666666666666 -0.2727673324494644  
-0.0000000000000005 0.0000000000000001 -0.8183019973483886  
-0.0000000000000001 -0.0000000000000000 -0.1636603994696803  
-0.6666666666666673 -1.3333333333333337 -0.7091950643686034  
-0.6666666666666667 -1.3333333333333335 -0.0545534664898954  
-0.3333333333333338 -0.6666666666666669 -0.6000881313888183  
-0.0000000000000003 -0.0000000000000000 -0.4909811984090345  
-0.6666666666666669 -1.3333333333333333 -0.3818742654292494  
-0.3333333333333336 -0.6666666666666666 -0.4364277319191414  
-0.6666666666666670 -1.3333333333333335 -0.5455346648989263  
-0.3333333333333338 -0.6666666666666666 -0.7637485308584954  
-0.3333333333333335 -0.6666666666666667 -0.1091069329797873  
-0.0000000000000004 0.0000000000000000 -0.6546415978787112  
-0.0000000000000002 0.0000000000000000 -0.3273207989393574  
-0.0000000000000000 0.0000000000000000 -0.0000000000000035  
-0.6666666666666673 -1.3333333333333335 -0.8728554638382805  
-0.6666666666666670 -1.3333333333333335 -0.2182138659595722

**File. S1.** The input POSCAR of  $(\text{LAO})_{6.5}/(\text{STO})_{2.5}$  (111) heterostructure under 10% in-plane compressive strain.

LAOSTO  
1.0000000000000000  
5.1336000000000000 0.0000000000000000 0.0000000000000000  
-2.5668000000000000 4.4458000000000000 0.0000000000000000  
0.0000000000000000 0.0000000000000000 20.1003197752325065  
O Al Ti Sr La  
27 6 3 2 7  
Direct  
-0.6666666666666672 -0.8333333333333334 -0.8728554638382802  
-0.0000000000000003 -0.4999999999999999 -0.6546415978787111  
-0.6666666666666667 -0.8333333333333335 -0.5455346648989262  
0.0000000000000004 -0.4999999999999996 -0.3273207989393573  
-0.6666666666666670 -0.8333333333333335 -0.2182138659595722  
0.0000000000000007 -0.4999999999999996 -0.0000000000000035  
0.8333333333333332 0.1666666666666665 -0.8728554638382802  
0.4999999999999998 0.4999999999999998 -0.6546415978787111  
0.8333333333333332 0.1666666666666667 -0.5455346648989262  
0.4999999999999995 0.5000000000000001 -0.3273207989393573  
0.8333333333333334 0.1666666666666666 -0.2182138659595722  
0.4999999999999996 0.5000000000000003 -0.0000000000000035  
-0.1666666666666667 0.6666666666666669 -0.8728554638382802  
-0.4999999999999998 0.0000000000000001 -0.6546415978787111  
-0.1666666666666670 0.6666666666666664 -0.5455346648989262  
-0.5000000000000001 -0.0000000000000005 -0.3273207989393573  
-0.1666666666666667 0.6666666666666667 -0.2182138659595722  
-0.5000000000000003 -0.0000000000000007 -0.0000000000000035  
-0.3333333333333333 -1.1666666666666663 -0.7637485308584951  
-0.3333333333333334 -1.1666666666666663 -0.4364277319191412  
-0.3333333333333330 -1.1666666666666663 -0.1091069329797873  
1.1666666666666663 0.8333333333333333 -0.7637485308584951  
1.1666666666666663 0.8333333333333333 -0.4364277319191412  
1.1666666666666663 0.8333333333333334 -0.1091069329797873  
-0.8333333333333335 0.3333333333333330 -0.7637485308584951  
-0.8333333333333335 0.3333333333333333 -0.4364277319191413  
-0.8333333333333334 0.3333333333333329 -0.1091069329797873  
-0.3333333333333339 -0.6666666666666666 -0.9274089303281725  
-0.3333333333333335 -0.6666666666666666 -0.2727673324494644  
-0.0000000000000005 0.0000000000000001 -0.8183019973483886  
-0.0000000000000001 -0.0000000000000000 -0.1636603994696803  
-0.6666666666666673 -1.3333333333333337 -0.7091950643686034  
-0.6666666666666667 -1.3333333333333335 -0.0545534664898954  
-0.3333333333333338 -0.6666666666666669 -0.6000881313888183  
-0.0000000000000003 -0.0000000000000000 -0.4909811984090345  
-0.6666666666666669 -1.3333333333333333 -0.3818742654292494  
-0.3333333333333336 -0.6666666666666666 -0.4364277319191414  
-0.6666666666666670 -1.3333333333333335 -0.5455346648989263  
-0.3333333333333338 -0.6666666666666666 -0.7637485308584954  
-0.3333333333333335 -0.6666666666666667 -0.1091069329797873  
-0.0000000000000004 0.0000000000000000 -0.6546415978787112  
-0.0000000000000002 0.0000000000000000 -0.3273207989393574  
-0.0000000000000000 0.0000000000000000 -0.0000000000000035  
-0.6666666666666673 -1.3333333333333335 -0.8728554638382805  
-0.6666666666666670 -1.3333333333333335 -0.2182138659595722

**File. S2.** The input POSCAR of  $(\text{LAO})_{6.5}/(\text{STO})_{2.5}$  (111) heterostructure under 6% in-plane compressive strain.

```

LAOSTO
1.0000000000000000
5.2750165900000000 0.0000000000000000 0.0000000000000000
-2.6375083000000000 4.5682983800000000 0.0000000000000000
0.0000000000000000 0.0000000000000000 20.1003197752325065
O Al Ti Sr La
27 6 3 2 7
Direct
-0.6666666666666672 -0.8333333333333334 -0.8728554638382802
-0.0000000000000003 -0.4999999999999999 -0.6546415978787111
-0.6666666666666667 -0.8333333333333335 -0.5455346648989262
0.0000000000000004 -0.4999999999999996 -0.3273207989393573
-0.6666666666666670 -0.8333333333333335 -0.2182138659595722
0.0000000000000007 -0.4999999999999996 -0.0000000000000035
0.8333333333333332 0.1666666666666665 -0.8728554638382802
0.4999999999999998 0.4999999999999998 -0.6546415978787111
0.8333333333333332 0.1666666666666667 -0.5455346648989262
0.4999999999999995 0.5000000000000001 -0.3273207989393573
0.8333333333333334 0.1666666666666666 -0.2182138659595722
0.4999999999999996 0.5000000000000003 -0.0000000000000035
-0.1666666666666667 0.6666666666666669 -0.8728554638382802
-0.4999999999999998 0.0000000000000001 -0.6546415978787111
-0.1666666666666670 0.6666666666666664 -0.5455346648989262
-0.5000000000000001 -0.0000000000000005 -0.3273207989393573
-0.1666666666666667 0.6666666666666667 -0.2182138659595722
-0.5000000000000003 -0.0000000000000007 -0.0000000000000035
-0.3333333333333333 -1.1666666666666663 -0.7637485308584951
-0.3333333333333334 -1.1666666666666663 -0.4364277319191412
-0.3333333333333330 -1.1666666666666663 -0.1091069329797873
1.1666666666666663 0.8333333333333333 -0.7637485308584951
1.1666666666666663 0.8333333333333333 -0.4364277319191412
1.1666666666666663 0.8333333333333334 -0.1091069329797873
-0.8333333333333335 0.3333333333333330 -0.7637485308584951
-0.8333333333333335 0.3333333333333333 -0.4364277319191413
-0.8333333333333334 0.3333333333333329 -0.1091069329797873
-0.3333333333333339 -0.6666666666666666 -0.9274089303281725
-0.3333333333333335 -0.6666666666666666 -0.2727673324494644
-0.0000000000000005 0.0000000000000001 -0.8183019973483886
-0.0000000000000001 -0.0000000000000000 -0.1636603994696803
-0.6666666666666673 -1.3333333333333337 -0.7091950643686034
-0.6666666666666667 -1.3333333333333335 -0.0545534664898954
-0.3333333333333338 -0.6666666666666669 -0.6000881313888183
-0.0000000000000003 -0.0000000000000000 -0.4909811984090345
-0.6666666666666669 -1.3333333333333333 -0.3818742654292494
-0.3333333333333336 -0.6666666666666666 -0.4364277319191414
-0.6666666666666670 -1.3333333333333335 -0.5455346648989263
-0.3333333333333338 -0.6666666666666666 -0.7637485308584954
-0.3333333333333335 -0.6666666666666667 -0.1091069329797873
-0.0000000000000004 0.0000000000000000 -0.6546415978787112
-0.0000000000000002 0.0000000000000000 -0.3273207989393574
-0.0000000000000000 0.0000000000000000 -0.0000000000000035
-0.6666666666666673 -1.3333333333333335 -0.8728554638382805
-0.6666666666666670 -1.3333333333333335 -0.2182138659595722

```

**File. S3.** The input POSCAR of  $(\text{LAO})_{6.5}/(\text{STO})_{2.5}$  (111) heterostructure under 3% in-plane compressive strain.

```

LAOSTO
1.0000000000000000
5.4482222000000000 -0.0000000000000000 -0.0000000000000000
-2.7241137027123008 4.7182895122718254 -0.0000000000000000
-0.0000000000000000 -0.0000000000000000 20.1003197752325065
O Al Ti Sr La
27 6 3 2 7
Direct
-0.6666666666666672 -0.8333333333333334 -0.8728554638382802
-0.0000000000000003 -0.4999999999999999 -0.6546415978787111
-0.6666666666666667 -0.8333333333333335 -0.5455346648989262
0.0000000000000004 -0.4999999999999996 -0.3273207989393573
-0.6666666666666670 -0.8333333333333335 -0.2182138659595722
0.0000000000000007 -0.4999999999999996 -0.0000000000000035
0.8333333333333332 0.1666666666666665 -0.8728554638382802
0.4999999999999998 0.4999999999999998 -0.6546415978787111
0.8333333333333332 0.1666666666666667 -0.5455346648989262
0.4999999999999995 0.5000000000000001 -0.3273207989393573
0.8333333333333334 0.1666666666666666 -0.2182138659595722
0.4999999999999996 0.5000000000000003 -0.0000000000000035
-0.1666666666666667 0.6666666666666669 -0.8728554638382802
-0.4999999999999998 0.0000000000000001 -0.6546415978787111
-0.1666666666666670 0.6666666666666664 -0.5455346648989262
-0.5000000000000001 -0.0000000000000005 -0.3273207989393573
-0.1666666666666667 0.6666666666666667 -0.2182138659595722
-0.5000000000000003 -0.0000000000000007 -0.0000000000000035
-0.3333333333333333 -1.1666666666666663 -0.7637485308584951
-0.3333333333333334 -1.1666666666666663 -0.4364277319191412
-0.3333333333333330 -1.1666666666666663 -0.1091069329797873
1.1666666666666663 0.8333333333333333 -0.7637485308584951
1.1666666666666663 0.8333333333333333 -0.4364277319191412
1.1666666666666663 0.8333333333333334 -0.1091069329797873
-0.8333333333333335 0.3333333333333330 -0.7637485308584951
-0.8333333333333335 0.3333333333333333 -0.4364277319191413
-0.8333333333333334 0.3333333333333329 -0.1091069329797873
-0.3333333333333339 -0.6666666666666666 -0.9274089303281725
-0.3333333333333335 -0.6666666666666666 -0.2727673324494644
-0.0000000000000005 0.0000000000000001 -0.8183019973483886
-0.0000000000000001 -0.0000000000000000 -0.1636603994696803
-0.6666666666666673 -1.3333333333333337 -0.7091950643686034
-0.6666666666666667 -1.3333333333333335 -0.0545534664898954
-0.3333333333333338 -0.6666666666666669 -0.6000881313888183
-0.0000000000000003 -0.0000000000000000 -0.4909811984090345
-0.6666666666666669 -1.3333333333333333 -0.3818742654292494
-0.3333333333333336 -0.6666666666666666 -0.4364277319191414
-0.6666666666666670 -1.3333333333333335 -0.5455346648989263
-0.3333333333333338 -0.6666666666666666 -0.7637485308584954
-0.3333333333333335 -0.6666666666666667 -0.1091069329797873
-0.0000000000000004 0.0000000000000000 -0.6546415978787112
-0.0000000000000002 0.0000000000000000 -0.3273207989393574
-0.0000000000000000 0.0000000000000000 -0.0000000000000035
-0.6666666666666673 -1.3333333333333335 -0.8728554638382805
-0.6666666666666670 -1.3333333333333335 -0.2182138659595722

```

**File. S4.** The input POSCAR of  $(\text{LAO})_{6.5}/(\text{STO})_{2.5}$  (111) heterostructure under 0% in-plane strain.

```

LAOSTO
1.0000000000000000
5.5720000000000000 0.0000000000000000 0.0000000000000000
-2.7860000000000000 4.8254935500000000 0.0000000000000000
0.0000000000000000 0.0000000000000000 20.1003197752325065
O Al Ti Sr La
27 6 3 2 7
Direct
-0.6666666666666672 -0.8333333333333334 -0.8728554638382802
-0.0000000000000003 -0.4999999999999999 -0.6546415978787111
-0.6666666666666667 -0.8333333333333335 -0.5455346648989262
0.0000000000000004 -0.4999999999999996 -0.3273207989393573
-0.6666666666666670 -0.8333333333333335 -0.2182138659595722
0.0000000000000007 -0.4999999999999996 -0.0000000000000035
0.8333333333333332 0.1666666666666665 -0.8728554638382802
0.4999999999999998 0.4999999999999998 -0.6546415978787111
0.8333333333333332 0.1666666666666667 -0.5455346648989262
0.4999999999999995 0.5000000000000001 -0.3273207989393573
0.8333333333333334 0.1666666666666666 -0.2182138659595722
0.4999999999999996 0.5000000000000003 -0.0000000000000035
-0.1666666666666667 0.6666666666666669 -0.8728554638382802
-0.4999999999999998 0.0000000000000001 -0.6546415978787111
-0.1666666666666670 0.6666666666666664 -0.5455346648989262
-0.5000000000000001 -0.0000000000000005 -0.3273207989393573
-0.1666666666666667 0.6666666666666667 -0.2182138659595722
-0.5000000000000003 -0.0000000000000007 -0.0000000000000035
-0.3333333333333333 -1.1666666666666663 -0.7637485308584951
-0.3333333333333334 -1.1666666666666663 -0.4364277319191412
-0.3333333333333330 -1.1666666666666663 -0.1091069329797873
1.1666666666666663 0.8333333333333333 -0.7637485308584951
1.1666666666666663 0.8333333333333333 -0.4364277319191412
1.1666666666666663 0.8333333333333334 -0.1091069329797873
-0.8333333333333335 0.3333333333333330 -0.7637485308584951
-0.8333333333333335 0.3333333333333333 -0.4364277319191413
-0.8333333333333334 0.3333333333333329 -0.1091069329797873
-0.3333333333333339 -0.6666666666666666 -0.9274089303281725
-0.3333333333333335 -0.6666666666666666 -0.2727673324494644
-0.0000000000000005 0.0000000000000001 -0.8183019973483886
-0.0000000000000001 -0.0000000000000000 -0.1636603994696803
-0.6666666666666673 -1.3333333333333337 -0.7091950643686034
-0.6666666666666667 -1.3333333333333335 -0.0545534664898954
-0.3333333333333338 -0.6666666666666669 -0.6000881313888183
-0.0000000000000003 -0.0000000000000000 -0.4909811984090345
-0.6666666666666669 -1.3333333333333333 -0.3818742654292494
-0.3333333333333336 -0.6666666666666666 -0.4364277319191414
-0.6666666666666670 -1.3333333333333335 -0.5455346648989263
-0.3333333333333338 -0.6666666666666666 -0.7637485308584954
-0.3333333333333335 -0.6666666666666667 -0.1091069329797873
-0.0000000000000004 0.0000000000000000 -0.6546415978787112
-0.0000000000000002 0.0000000000000000 -0.3273207989393574
-0.0000000000000000 0.0000000000000000 -0.0000000000000035
-0.6666666666666673 -1.3333333333333335 -0.8728554638382805
-0.6666666666666670 -1.3333333333333335 -0.2182138659595722

```

**File. S5.** The input POSCAR of  $(\text{LAO})_{6.5}/(\text{STO})_{2.5}$  (111) heterostructure under 2% in-plane tensile strain.

LAOSTO  
1.0000000000000000  
5.6568542500000000 0.0000000000000000 0.0000000000000000  
-2.8284271200000000 4.8989794800000000 0.0000000000000000  
0.0000000000000000 0.0000000000000000 20.1003197752325065

O Al Ti Sr La  
27 6 3 2 7

Direct  
-0.6666666666666672 -0.8333333333333334 -0.8728554638382802  
-0.0000000000000003 -0.4999999999999999 -0.6546415978787111  
-0.6666666666666667 -0.8333333333333335 -0.5455346648989262  
0.0000000000000004 -0.4999999999999996 -0.3273207989393573  
-0.6666666666666670 -0.8333333333333335 -0.2182138659595722  
0.0000000000000007 -0.4999999999999996 -0.0000000000000035  
0.8333333333333332 0.1666666666666665 -0.8728554638382802  
0.4999999999999998 0.4999999999999998 -0.6546415978787111  
0.8333333333333332 0.1666666666666667 -0.5455346648989262  
0.4999999999999995 0.5000000000000001 -0.3273207989393573  
0.8333333333333334 0.1666666666666666 -0.2182138659595722  
0.4999999999999996 0.5000000000000003 -0.0000000000000035  
-0.1666666666666667 0.6666666666666669 -0.8728554638382802  
-0.4999999999999998 0.0000000000000001 -0.6546415978787111  
-0.1666666666666670 0.6666666666666664 -0.5455346648989262  
-0.5000000000000001 -0.0000000000000005 -0.3273207989393573  
-0.1666666666666667 0.6666666666666667 -0.2182138659595722  
-0.5000000000000003 -0.0000000000000007 -0.0000000000000035  
-0.3333333333333333 -1.1666666666666663 -0.7637485308584951  
-0.3333333333333334 -1.1666666666666663 -0.4364277319191412  
-0.3333333333333330 -1.1666666666666663 -0.1091069329797873  
1.1666666666666663 0.8333333333333333 -0.7637485308584951  
1.1666666666666663 0.8333333333333333 -0.4364277319191412  
1.1666666666666663 0.8333333333333334 -0.1091069329797873  
-0.8333333333333335 0.3333333333333330 -0.7637485308584951  
-0.8333333333333335 0.3333333333333333 -0.4364277319191413  
-0.8333333333333334 0.3333333333333329 -0.1091069329797873  
-0.3333333333333339 -0.6666666666666666 -0.9274089303281725  
-0.3333333333333335 -0.6666666666666666 -0.2727673324494644  
-0.0000000000000005 0.0000000000000001 -0.8183019973483886  
-0.0000000000000001 -0.0000000000000000 -0.1636603994696803  
-0.6666666666666673 -1.3333333333333337 -0.7091950643686034  
-0.6666666666666667 -1.3333333333333335 -0.0545534664898954  
-0.3333333333333338 -0.6666666666666669 -0.6000881313888183  
-0.0000000000000003 -0.0000000000000000 -0.4909811984090345  
-0.6666666666666669 -1.3333333333333333 -0.3818742654292494  
-0.3333333333333336 -0.6666666666666666 -0.4364277319191414  
-0.6666666666666670 -1.3333333333333335 -0.5455346648989263  
-0.3333333333333338 -0.6666666666666666 -0.7637485308584954  
-0.3333333333333335 -0.6666666666666667 -0.1091069329797873  
-0.0000000000000004 0.0000000000000000 -0.6546415978787112  
-0.0000000000000002 0.0000000000000000 -0.3273207989393574  
-0.0000000000000000 0.0000000000000000 -0.0000000000000035  
-0.6666666666666673 -1.3333333333333335 -0.8728554638382805  
-0.6666666666666670 -1.3333333333333335 -0.2182138659595722

**File. S6.** The input POSCAR of  $(\text{LAO})_{6.5}/(\text{STO})_{2.5}$  (111) heterostructure under 4% in-plane tensile strain.

```
SYSTEM = LAOSTO
ENCUT = 500
ISTART = 0
ICHARG = 2
ISMEAR = 0
SIGMA = 0.1
NSW = 500
IBRION = 1
POTIM = 0.2
ISIF = 3
EDIFF = 1E-5
EDIFFG = -0.01
PREC = Accurate
LPLANE = .TRUE.
LSCALU = .FALSE.
NSIM = 4
ALGO = FAST
NPAR = 2
LDAUU = 0 0 5 0 11
LDAUJ = 0 0 0.64 0 0.68
LDAU = .TRUE.
LDAUTYPE = 2
LDAUL = -1 -1 2 -1 3
ISPIN = 2
VOSKOWN = 1
LORBIT = 11
LMAXMIX = 6
#LWAVE = .FALSE.
#LCHARG = .FALSE.
LREAL = A
```

**File. S7.** The INCAR file for structural optimization of  $(\text{LAO})_{6.5}/(\text{STO})_{2.5}$  (111) heterostructures under different in-plane strain.



```

LAOSTO
1.0000000000000000
4.8931789300000000 0.0000000000000000 0.0000000000000000
-2.4465894600000000 4.2376172600000000 0.0000000000000000
0.0000000000000000 0.0000000000000000 21.5433064998978523
O Al Ti Sr La
27 6 3 2 7
Direct
0.3333212223516546 0.1666569945413319 0.1157849680284450
0.0030275303497261 0.5015141270930552 0.3308337133540370
0.3307830023983076 0.1653970849956225 0.4480244717761737
0.9969331297021427 0.4984764887716154 0.6856852383958868
0.3326213479939819 0.1663054457117456 0.7928710396330150
1.0000096191289496 0.5000034326758176 0.0081478289937963
0.8333541053396002 0.1666558827590059 0.1157818501918224
0.4984826713697536 0.5015077430639671 0.3308336573122962
0.8346127526380742 0.1653967097462455 0.4480233667082051
0.5015465875724464 0.4984770295288855 0.6856838854782364
0.8336851205044865 0.1663069050164760 0.7928730474644540
0.4999962158372658 0.5000029467549214 0.0081494682374605
0.8333529453703410 0.6666910031345149 0.1157828659187792
0.498489866863973 0.9969651569475367 0.3308365686341968
0.8346112905962298 0.6692292361384924 0.4480216221604284
0.5015466664179591 0.0030717178308506 0.6856826675327737
0.8336821204556526 0.6673628658382275 0.7928779576828224
0.4999970810641761 -0.0000093331151784 0.0081505474037608
0.6673054780009801 0.8336522095789821 0.2235435220449606
0.6691968567965509 0.8345939850699291 0.5685001710114324
0.6666438194282819 0.8333285834583062 0.9005138789351032
0.1663473340797612 0.8336530102503296 0.2235431294202352
0.1653357946522170 0.8346119736746821 0.5685190212299515
0.1666962709809562 0.8333286121824760 0.9005120824230270
0.1663535285559559 0.3327029331696643 0.2235425731815319
0.1653284811296417 0.3306984466694187 0.5685260459500551
0.1666996045639878 0.3333893402079611 0.9005064361897852
0.6666705912614060 0.3333337772632300 0.0620043393104501
0.6666698443391258 0.3333352752125127 0.7399323140027089
0.0000047365667240 0.0000015228050519 0.1695692834042844
0.0000038487701581 0.0000028094943636 0.8467938160902191
0.3333355059521956 0.6666677117164308 0.2765689590140333
0.3333383012044830 0.6666709059635471 0.9542692108095251
0.6666690568481352 0.3333364413195445 0.3917966564857145
-0.0000031836442412 0.000000157891459 0.5082765595044517
0.3333319664351710 0.6666667245593239 0.6247570551712777
0.6666557421648456 0.3333276485130586 0.5640453122433016
0.3333381463142920 0.6666745457324695 0.4526046526986413
0.6666706875018718 0.3333354563397441 0.2241392362296486
0.6666721460815348 0.3333382102837438 0.9006484000048797
0.0000023448248056 0.9999997660100968 0.3329236216373842
0.0000044903398933 0.0000040322253287 0.6836063046129759
0.0000026957819594 1.0000007560561686 0.0081371496693837
0.3333376684499517 0.6666672592308062 0.1156539450876204
0.3333348468421748 0.6666666097905448 0.7922924239605531

```

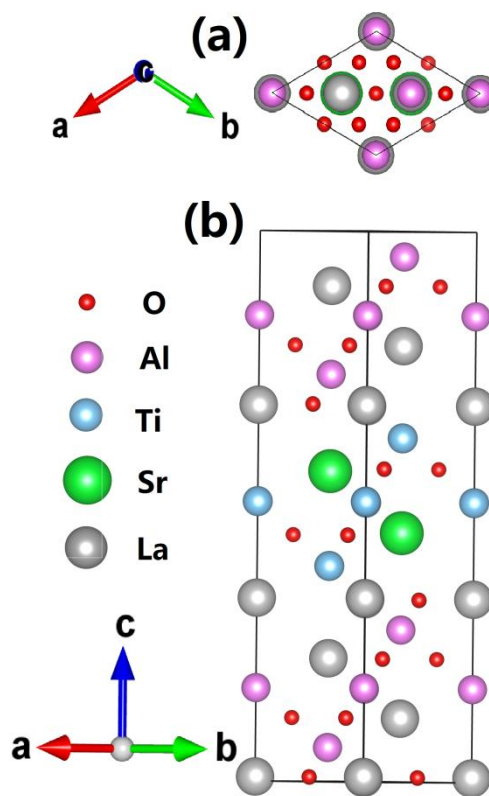

**File. S8.** The output structure file and geometry of  $(\text{LAO})_{6.5}/(\text{STO})_{2.5}$  (111) heterostructure under 10% in-plane compressive strain.

```

LAOSTO
1.0000000000000000
5.1336000000000000 0.0000000000000000 0.0000000000000000
-2.5668000000000000 4.4458000000000000 0.0000000000000000
0.0000000000000000 0.0000000000000000 20.8447548546000796
O Al Ti Sr La
27 6 3 2 7
Direct
0.3333023167060148 0.1666499370228840 0.1164359520236872
0.0028495455296387 0.5014197415267864 0.3320384349293239
0.3305208742310468 0.1652608984210348 0.4482058244935765
-0.0028212583127872 0.4985877634053792 0.6843879389920403
0.3325425954681434 0.1662698953861761 0.7917691779893964
-0.0000063944128329 0.4999957939013491 0.0082238364924826
0.8333444819956980 0.1666487349037119 0.1164365880746486
0.4985437239718040 0.5014059813328525 0.3320408465833783
0.8347558530287185 0.1652664378658029 0.4482012128134277
0.5014289751453683 0.4985904068253896 0.6843858790496649
0.8337342153193108 0.1662704498232788 0.7917709084424137
0.5000167552802195 0.4999920920123804 0.0082256552748714
0.8333459833317247 0.6666920592724462 0.1164379791742227
0.4985583016052095 -0.0028833561310865 0.3320441842710277
0.8347524998337861 0.6694999159740832 0.4481994105931111
0.5014266429997316 0.0028341430984639 0.6843865973744619
0.8337333083032527 0.6674607367199178 0.7917717619799549
0.5000133539643987 0.0000248378137054 0.0082259339796728
0.6674772732917756 0.8337360245636082 0.2247421981615630
0.6694232793859580 0.8347189859885310 0.5681180238554938
0.6667250535442344 0.8333659379552757 0.9000242804309304
0.1662690015743254 0.8337474198436765 0.2247404891249314
0.1652492682354426 0.8347247187455886 0.5681305276844716
0.1666485778681800 0.8333626770062127 0.9000234237569494
0.1662599588530890 0.3325309967863555 0.2247394883963906
0.1652487610439764 0.3305262576052002 0.5681319670999181
0.1666527316757654 0.3332933106014363 0.9000224853114912
0.6666664559655912 0.3333330568504692 0.0623917102187827
0.6666734450658860 0.3333367646593240 0.7384223699530108
-0.0000012185371695 -0.000000441790173 0.17048404344499325
0.0000053490415929 0.0000036235046672 0.8459506692372228
0.3333256091752191 0.6666600874617047 0.2780473247269453
0.3333376986882682 0.6666703596493252 0.9540593296067431
0.6666614112479610 0.3333277538113462 0.3926192599680028
-0.0000016516819015 0.0000011855289777 0.5081596206208855
0.3333342923743708 0.6666695314928662 0.6237402670021562
0.6666630750331245 0.3333356526778291 0.5652770918513670
0.3333362664876137 0.6666688107783200 0.4511726647265357
0.6666619434217428 0.3333301340055884 0.2250697729398782
0.6666715558496622 0.3333366325035252 0.9001953518058430
-0.0000088419255172 -0.0000083242485482 0.3341146008436385
0.0000056667816698 0.0000041913395708 0.6823454335514927
0.0000024132910910 0.0000019820708757 0.0081326818696743
0.3333325075260297 0.6666666102053259 0.1163146213275823
0.3333383427335728 0.6666691936174112 0.7914130451765292

```

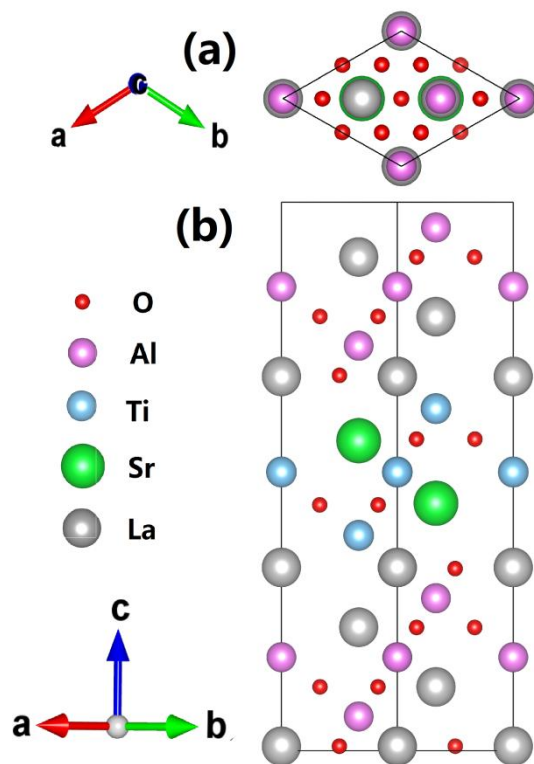

**File. S9.** The output structure file and geometry of  $(\text{LAO})_{6.5}/(\text{STO})_{2.5}$  (111) heterostructure under 6% in-plane compressive strain.

```

LAOSTO
1.0000000000000000
5.2750165900000000 0.0000000000000000 0.0000000000000000
-2.6375083000000000 4.5682983800000000 0.0000000000000000
0.0000000000000000 0.0000000000000000 20.4935000910491638
O Al Ti Sr La
27 6 3 2 7
Direct
0.3333073592705606 0.1666482980898721 0.1168260326476740
0.0028507029568977 0.5014286543511877 0.3329068678631761
0.3304763711347387 0.1652381185454507 0.4484026397319551
-0.0027683267206440 0.4986159425157507 0.6835449041937088
0.3326891082126378 0.1663508020574259 0.7911136536488041
0.0000061779737183 0.5000038666103093 0.0082692382407243
0.8333393199975140 0.1666510917023030 0.1168268281550438
0.4985641680091980 0.5014268959558933 0.3329098289066253
0.8347634890966115 0.1652403735502880 0.4484023549611476
0.5013800830412909 0.4986139914161983 0.6835449505806199
0.8336593194347515 0.1663486395413551 0.7911157026126008
0.4999974816050976 0.5000042123500641 0.0082684615310888
0.8333363200247507 0.6666784736087948 0.1168284903438732
0.4985737190760514 -0.0028544765671850 0.3329081072017809
0.8347651651671016 0.6695280807083281 0.4484016892557491
0.5013811714206912 0.0027619686379641 0.6835466712450375
0.8336595056992034 0.6673247320651761 0.7911125863129392
0.4999976370185760 -0.0000043509562061 0.0082688787630514
0.6674577185371305 0.8337290999296674 0.2254391135459526
0.6694713650295649 0.8347363048575793 0.5678871006749732
0.6667173932461086 0.8333554910158311 0.8996905755450935
0.1662735913311334 0.8337299692539758 0.2254378919382131
0.1652648686757286 0.8347346820066465 0.5678867148442398
0.1666486523753500 0.8333521580024762 0.8996878464413458
0.1662746622417671 0.3325465567095727 0.2254369999534238
0.1652650746172055 0.3305302218563924 0.5678873024195310
0.1666492627463261 0.3332866826382489 0.8996904995348889
0.6666644362673727 0.3333316554124795 0.0625976043013137
0.6666669513367026 0.3333353271313954 0.7373789857040315
-0.0000015810547394 -0.0000015668239551 0.1710462637307118
0.0000024019930286 0.0000022208476201 0.8454056228659698
0.3333326563156021 0.6666677453682647 0.2790613294227158
0.3333347737346573 0.6666667998448650 0.9538835384788932
0.6666678070864288 0.3333352325118097 0.3932650079147615
-0.0000005675536606 -0.0000095333061658 0.5081400543203584
0.3333325544819625 0.6666657844710787 0.6230435281981104
0.6666673013136106 0.3333334524464749 0.5656283321583965
0.3333340975290139 0.6666674465365768 0.4506863115156453
0.6666659405088903 0.3333339416808521 0.2255703094593172
0.6666676660366246 0.333330734839508 0.8998072150697106
-0.0000008403582403 0.0000009618335737 0.3348920513743903
0.0000002737110647 0.0000005725652818 0.6814645115541703
-0.0000013334586962 -0.0000026534627447 0.0081927612562135
0.3333317053773533 0.6666650089809409 0.1166093961524730
0.3333343955139562 0.6666680500243434 0.7908561106592767

```

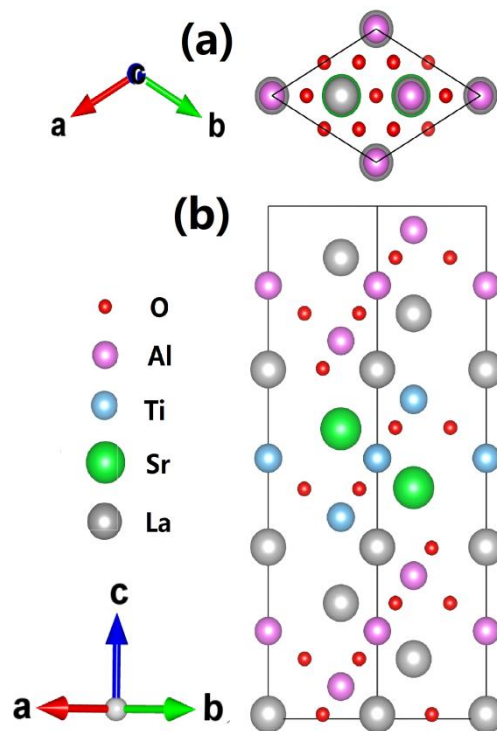

**File. S10.** The output structure file and geometry of  $(\text{LAO})_{6.5}/(\text{STO})_{2.5}$  (111) heterostructure under 3% in-plane compressive strain.

```

LAOSTO
1.0000000000000000
5.4482222000000000 0.0000000000000000 0.0000000000000000
-2.7241137027123008 4.7182895122718254 0.0000000000000000
0.0000000000000000 0.0000000000000000 20.1074574048769605
O Al Ti Sr La
27 6 3 2 7
Direct
0.3332667246188898 0.1666312452514403 0.1170609385607641
0.0023467305436677 0.5011454441542452 0.3339680054984894
0.3303367624603814 0.1651714844476313 0.4487462229550736
0.9977745090409131 0.4988914320356811 0.6825956332787588
0.3327421924806916 0.1663704196346769 0.7902143004163202
-0.0000020493121852 0.4999997208661683 0.0081567478763734
0.8333664793653067 0.1666334247968453 0.1170613877498640
0.4988541827963709 0.5011462372556117 0.3339547895809326
0.8348235158519728 0.1651762432925565 0.4487558005317372
0.5011096749830115 0.4988912406474755 0.6825971911475659
0.8336263606177974 0.1663736944149312 0.7902147602351708
0.4999903656662916 0.5000108469568196 0.0081506926674460
0.8333681315708192 0.6667333459426580 0.1170608314032955
0.4988541508566530 0.9976531604062763 0.3339679094200944
0.8348282519779406 0.6696626567331970 0.4487462368164479
0.5011089575713642 0.0022257610838308 0.6825956975895839
0.8336300083966012 0.6672578228436475 0.7902143926797189
0.5000003628231396 1.0000024400254248 0.0081568240350368
0.6674694145038307 0.8337513330589461 0.2262443216997685
0.6697902375788612 0.8348921388317251 0.5678226103207463
0.6667860192472198 0.8333881695314432 0.8992778682395295
0.1662371682373007 0.8337627590931703 0.2262566293047191
0.1651146993587065 0.8348848143699255 0.5678180539814158
0.1666154729481802 0.8333857999339076 0.8992743614333863
0.1662489938444152 0.3325302924765376 0.2262442662371686
0.1651078739346034 0.3302096773569448 0.5678225640284537
0.1666128969995554 0.3332150124275223 0.8992779076705302
0.6666646858573272 0.3333351656548872 0.0626493360833535
0.6666657847996417 0.3333345826268315 0.7360282436147042
0.9999939461217153 0.0000055270860855 0.1716293459451596
0.0000010919192466 0.999993571025296 0.8447102525662786
0.3333324098039550 0.6666671297968383 0.2804072588589075
0.3333325209725722 0.6666677808876890 0.9536318248204739
0.6666698019389281 0.3333299358221089 0.3942175818486716
0.0000006483751631 0.9999991458413435 0.5082537502318688
0.3333345350428257 0.6666654568874482 0.6222854488676870
0.6666688001684314 0.3333305628056201 0.5660780973721622
0.3333326165866133 0.6666668639656841 0.4503605437708808
0.6666663440012851 0.3333327185879330 0.2261819161252904
0.6666663844212740 0.3333332711102295 0.8993057000418262
0.9999974047691477 0.0000022174487730 0.3359236901413705
0.0000006495002706 0.9999991759164163 0.6805378628923402
0.9999991490215043 0.0000001437832617 0.0081399436151457
0.3333315604072050 0.6666677685813531 0.1169551244789714
0.3333335773306221 0.6666665782257564 0.7902179985962410

```

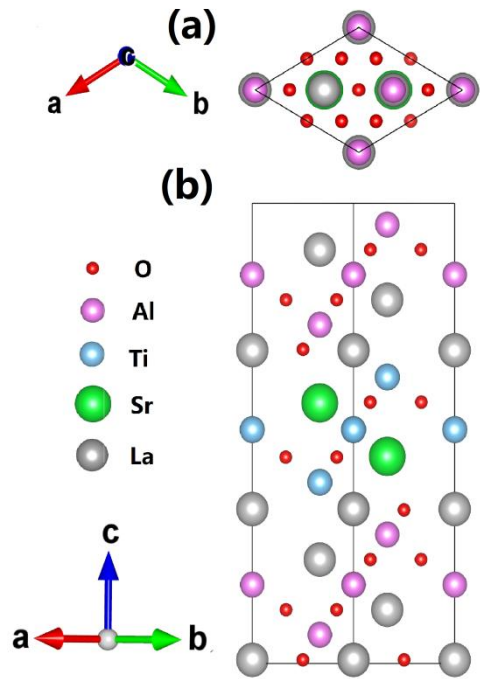

**File. S11.** The output structure file and geometry of  $(\text{LAO})_{6.5}/(\text{STO})_{2.5}$  (111) heterostructure under 0% in-plane strain.

```

LAOSTO
1.0000000000000000
5.5720000000000000 0.0000000000000000 0.0000000000000000
-2.7860000000000000 4.8254935500000000 0.0000000000000000
0.0000000000000000 0.0000000000000000 19.8481186345660632
O Al Ti Sr La
27 6 3 2 7
Direct
0.3331717641361210 0.1665881681870842 0.1173439656039730
0.0017865005089437 0.5008933283295353 0.3344875896546156
0.3300681829424736 0.1650358769657343 0.4488907699302521
-0.0019665134000296 0.4990170394951710 0.6818834685299997
0.3324595330578262 0.1662261144849207 0.7897093334902405
0.0000701781344020 0.5000342904124447 0.0082289339449712
0.8334145606143840 0.1665865994097352 0.1173445651696769
0.4991116129444105 0.5008934141644830 0.3344867418718988
0.8349649935787943 0.1650320526208402 0.4488882639180520
0.5009569534084886 0.4990153877409224 0.6818913849467576
0.8337886519821185 0.1662374949027111 0.7897038190655513
0.4999711062550840 0.5000376177889874 0.00822753359045188
0.8334165965095879 0.6668296509281049 0.1173443741435423
0.4991123709844571 -0.0017820255198807 0.3344868524176590
0.8349658197319932 0.6699339364621343 0.4488876482001098
0.5009646845161639 0.0019465098710295 0.6818896118122344
0.8337786525319710 0.6675564427255809 0.7897029620179362
0.4999680614969744 -0.0000663990893139 0.0082277308934743
0.6673893001971304 0.8336935057799084 0.2266564618139263
0.6700728006645315 0.8350293322942828 0.5675427028199697
0.6666991455086413 0.8333518586101921 0.8990722738873870
0.1663080216199699 0.8336959510253033 0.2266566506907444
0.1649791482087119 0.8350389296068321 0.5675372837630899
0.1666453331865801 0.8333474196137258 0.8990752257993533
0.16630628110380492 0.3326112343987275 0.2266568543210915
0.1649680751729303 0.3299326434160536 0.5675390942734457
0.1666468518920752 0.3332963195213327 0.8990752791862517
0.6666675924901476 0.3333341363716684 0.0628369367604713
0.6666638466285441 0.3333322536991419 0.7351672309828777
-0.000000114736181 0.0000001797488909 0.1720891689773188
0.0000002997777425 0.0000007157237291 0.8444191157960377
0.3333342004731664 0.6666669999376230 0.2812418511794014
0.3333317891257624 0.6666660410923048 0.9536303100858861
0.666665080602370 0.3333324557139560 0.3946631819045276
0.0000012524412536 -0.000000320725046 0.5082131995716710
0.3333302811247768 0.6666643571029005 0.6218068478801114
0.6666654798177993 0.3333319057150446 0.5662052725427206
0.3333319839604916 0.6666658209428080 0.4504055725412016
0.6666661033532983 0.3333336140507726 0.2265029887779316
0.6666643865881895 0.3333319893814299 0.8990628049175934
-0.0000014346422566 -0.0000003661318221 0.3364722657091733
-0.0000015062767526 -0.0000019391620746 0.6799197469719223
-0.0000008902652050 -0.0000005237111893 0.0084173264968446
0.3333316283731604 0.6666656432249027 0.1172839027373110
0.3333299230204790 0.6666640542258383 0.7899957633259979

```

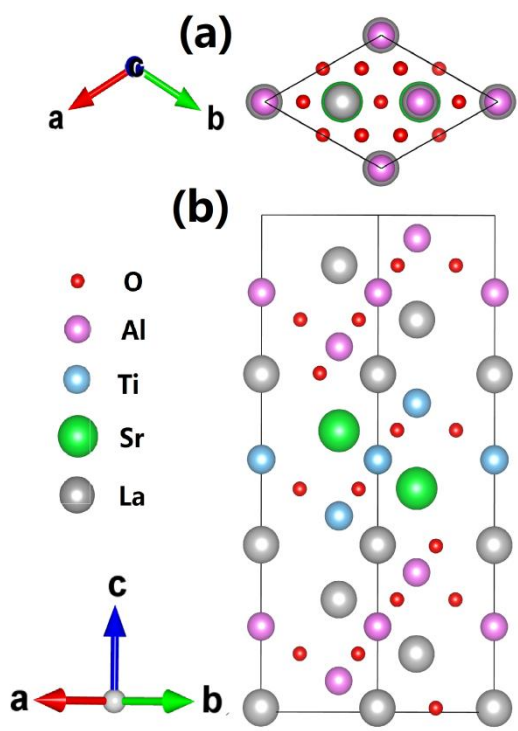

**File. S12.** The output structure file and geometry of  $(\text{LaO})_{6.5}/(\text{STO})_{2.5}$  (111) heterostructure under 2% in-plane tensile strain.

```

LAOSTO
1.0000000000000000
5.6568542500000000 0.0000000000000000 0.0000000000000000
-2.8284271200000000 4.8989794800000000 0.0000000000000000
0.0000000000000000 0.0000000000000000 19.6969358872877649
O Al Ti Sr La
27 6 3 2 7
Direct
0.3332052118472880 0.1666022694475916 0.1175750733707458
0.0012689139240236 0.5006364056318261 0.3349920857552404
0.3300114167453493 0.1650055983907728 0.4490664410610342
-0.0011852074104648 0.4994055458738393 0.6813884968691880
0.3325596365913168 0.1662794913793695 0.7892427611843684
0.0000599865984402 0.5000297444256393 0.0082432766241140
0.8334031338463475 0.1666014958452239 0.1175739577115563
0.4993592458176027 0.5006362409605262 0.3349934173567405
0.8349929287110366 0.1650079229561223 0.4490659226999830
0.5005936666626059 0.4994063351028520 0.6813881107028804
0.8337193727715823 0.1662786735726572 0.7892429284677444
0.4999711240875676 0.5000315677052941 0.0082436270587609
0.8334018576667256 0.6668038088349468 0.1175736004476327
0.4993570491732641 -0.0012736219261893 0.3349924110959168
0.8349924697139548 0.6699839428295031 0.4490666715161605
0.5005902731382682 0.0011874502227767 0.6813882363110605
0.8337202111129254 0.6674390813859148 0.7892431021732946
0.4999717017649069 -0.0000585674169995 0.0082434156619408
0.6674864531427368 0.8337434847790717 0.2271244326875248
0.6700644611208638 0.8350328302452232 0.5673392852992378
0.6667364343036076 0.8333671782722371 0.8988445079224811
0.1662556200835411 0.8337409749222550 0.2271240556473728
0.1649649895014823 0.8350317127514015 0.5673393948051972
0.1666365043987492 0.8333690799188617 0.8988439821034436
0.1662575545926938 0.3325135587982439 0.2271238643238127
0.1649672643342359 0.3299339930134874 0.5673392929944077
0.1666340014010913 0.3332680524275108 0.8988438104569036
0.6666682065626599 0.3333344925586343 0.0629327588285179
0.6666667712775459 0.3333323383884569 0.7344980147432397
0.0000017318977184 0.0000006364998366 0.1724101410925561
0.0000009628970740 0.0000001049649434 0.8440601493899721
0.3333326720291459 0.6666662084048474 0.2819501096800554
0.3333342298767977 0.6666671076349189 0.9535474194044226
0.6666653599314095 0.3333326238085165 0.3950769934008310
0.0000005528757645 0.0000001961897351 0.5082031716882821
0.3333324761175219 0.6666656960303109 0.6213931254149976
0.6666660870866951 0.3333325488791112 0.5661762778547216
0.3333323302379017 0.6666660745282135 0.4504226698159965
0.6666665354626683 0.3333330628407011 0.2268697430203518
0.6666670419814463 0.3333330078475017 0.8988244050062451
0.0000024005469101 -0.0000004910921228 0.3369125323703517
0.0000007687287123 -0.0000013116290070 0.6794555213487239
-0.0000020988029813 -0.0000004789910714 0.0083651152691591
0.3333345440581358 0.6666674049868067 0.1175830970737202
0.3333331515931304 0.6666665277997093 0.7896434575188405

```

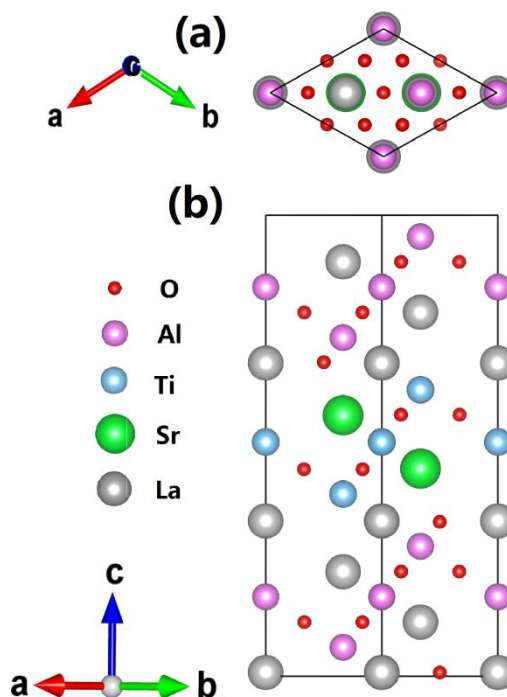

**File. S13.** The output structure file and geometry of  $(\text{LAO})_{6.5}/(\text{STO})_{2.5}$  (111) heterostructure under 4% in-plane tensile strain.

LAOSTO

1.00000000000000

|                   |                    |                    |
|-------------------|--------------------|--------------------|
| 9.436583390853624 | -5.448238117075710 | -0.000026625025665 |
| 0.000000000000000 | 10.896439999933618 | -0.000038035750951 |
| 0.000000000000000 | 0.000000000000000  | 20.102930000000001 |

O Al Ti Sr La  
108 24 12 8 28

Direct

|                    |                   |                   |
|--------------------|-------------------|-------------------|
| 0.166990000000000  | 0.083482000000000 | 0.117536000000001 |
| 0.000818000000000  | 0.250359000000000 | 0.334354000000003 |
| 0.167424000000000  | 0.083718000000001 | 0.450957000000000 |
| 0.495393000000000  | 0.247723000000000 | 0.679361000000002 |
| 0.165166000000000  | 0.082614500000000 | 0.789430000000000 |
| -0.000009999999998 | 0.249995500000000 | 0.008155000000000 |
| 0.416738000000000  | 0.083445500000000 | 0.117002000000001 |
| 0.245362000000001  | 0.247227000000000 | 0.334929000000003 |
| 0.417988000000001  | 0.087148000000001 | 0.452104000000001 |
| 0.248274000000000  | 0.244871500000001 | 0.680347000000003 |
| 0.414951000000000  | 0.083916500000001 | 0.791524000000003 |
| 0.249492000000001  | 0.249749500000000 | 0.008499000000000 |
| 0.416743000000000  | 0.333287500000001 | 0.117000000000001 |
| 0.245362000000001  | 0.498164000000001 | 0.334888000000002 |
| 0.418084000000001  | 0.330793500000000 | 0.452127000000002 |
| 0.248254000000000  | 0.003432000000000 | 0.680349000000003 |
| 0.414951000000000  | 0.331052000000002 | 0.791527000000001 |
| 0.249491000000001  | 0.499742500000000 | 0.008496000000000 |
| 0.330607000000001  | 0.415277500000001 | 0.224535000000002 |
| 0.333122000000001  | 0.416566000000001 | 0.566348000000003 |
| 0.333489000000001  | 0.416745000000000 | 0.899664000000005 |
| 0.082293000000000  | 0.416497000000003 | 0.226515000000002 |
| 0.085662000000000  | 0.419782000000001 | 0.567113000000003 |
| 0.083779000000000  | 0.416757999999999 | 0.898971000000004 |
| 0.082322000000000  | 0.165772500000000 | 0.226513000000001 |
| 0.085648000000000  | 0.165814500000001 | 0.567164000000003 |
| 0.083780000000000  | 0.167020000000001 | 0.898985000000005 |
| 0.666663000000001  | 0.083330000000002 | 0.116814000000001 |
| 0.504520000000001  | 0.252241500000002 | 0.337050000000002 |
| 0.666755000000002  | 0.083388500000002 | 0.450133000000000 |
| 0.999201999999999  | 0.249645500000000 | 0.682219000000002 |
| 0.669389000000001  | 0.084719500000000 | 0.791853000000004 |
| 0.499955000000000  | 0.249983000000001 | 0.008172000000000 |
| 0.916407000000001  | 0.083275500000001 | 0.117295000000001 |
| 0.751667000000002  | 0.255045000000001 | 0.336091000000002 |
| 0.914274000000000  | 0.080212999999999 | 0.449379000000002 |
| 0.754608000000002  | 0.252789500000001 | 0.681563000000003 |
| 0.917651000000001  | 0.083501000000000 | 0.789933000000006 |
| 0.750455000000001  | 0.250278500000000 | 0.008002000000000 |
| 0.916405000000000  | 0.333140000000001 | 0.117283000000000 |
| 0.751729000000002  | 0.496518000000001 | 0.336122000000003 |
| 0.914293000000001  | 0.334181500000000 | 0.449311000000004 |
| 0.754630000000004  | 0.001812500000001 | 0.681602000000000 |
| 0.917623000000002  | 0.334195500000002 | 0.789917000000005 |
| 0.750458000000001  | 0.000174500000001 | 0.008002000000000 |
| 0.834878000000003  | 0.417421500000004 | 0.226956000000001 |
| 0.832477000000000  | 0.416230000000000 | 0.565456000000003 |
| 0.832979000000001  | 0.416491000000000 | 0.898766000000005 |
| 0.585100000000001  | 0.416089000000002 | 0.224876000000001 |
| 0.581927000000000  | 0.412833000000002 | 0.564400000000000 |
| 0.583283999999999  | 0.416533000000001 | 0.899399000000003 |
| 0.585098000000000  | 0.168988000000003 | 0.224869000000001 |
| 0.581831000000000  | 0.169132500000001 | 0.564386000000003 |
| 0.583261999999998  | 0.166743000000001 | 0.899410000000003 |
| 0.166990000000000  | 0.583482000000001 | 0.117536000000000 |
| 0.000818000000000  | 0.750359000000000 | 0.334354000000003 |
| 0.167424000000000  | 0.583718000000001 | 0.450957000000000 |
| 0.495393000000000  | 0.747723000000000 | 0.679361000000002 |
| 0.165166000000000  | 0.582614500000000 | 0.789430000000000 |

|                    |                    |                   |
|--------------------|--------------------|-------------------|
| -0.000009999999998 | 0.749995499999999  | 0.008155000000000 |
| 0.416738000000000  | 0.583445500000000  | 0.117002000000000 |
| 0.245362000000000  | 0.747227000000000  | 0.334929000000000 |
| 0.417988000000000  | 0.587148000000000  | 0.452104000000000 |
| 0.248274000000000  | 0.744871500000000  | 0.680347000000000 |
| 0.414951000000000  | 0.583916500000000  | 0.791524000000000 |
| 0.249492000000000  | 0.749749500000000  | 0.008499000000000 |
| 0.416743000000000  | 0.833287500000000  | 0.117000000000000 |
| 0.245362000000000  | 0.998164000000000  | 0.334888000000000 |
| 0.418084000000000  | 0.830793500000000  | 0.452127000000000 |
| 0.248254000000000  | 0.503432000000000  | 0.680349000000000 |
| 0.414951000000000  | 0.831052000000000  | 0.791527000000000 |
| 0.249491000000000  | 0.999742500000000  | 0.008496000000000 |
| 0.330607000000000  | 0.915277500000000  | 0.224535000000000 |
| 0.333122000000000  | 0.916566000000000  | 0.566348000000000 |
| 0.333489000000000  | 0.916745000000000  | 0.899664000000000 |
| 0.082293000000000  | 0.916497000000000  | 0.226515000000000 |
| 0.085662000000000  | 0.919782000000000  | 0.567113000000000 |
| 0.083779000000000  | 0.916757999999999  | 0.898971000000000 |
| 0.082322000000000  | 0.665772500000000  | 0.226513000000000 |
| 0.085648000000000  | 0.665814500000000  | 0.567164000000000 |
| 0.083780000000000  | 0.667020000000000  | 0.898985000000000 |
| 0.666663000000000  | 0.583330000000000  | 0.116814000000000 |
| 0.504520000000000  | 0.752241500000000  | 0.337050000000000 |
| 0.666755000000000  | 0.583388500000000  | 0.450133000000000 |
| 0.999201999999999  | 0.749645500000000  | 0.682219000000000 |
| 0.669389000000000  | 0.584719500000000  | 0.791853000000000 |
| 0.499955000000000  | 0.749983000000000  | 0.008172000000000 |
| 0.916407000000000  | 0.583275500000000  | 0.117295000000000 |
| 0.751667000000000  | 0.755045000000000  | 0.336091000000000 |
| 0.914274000000000  | 0.580212999999999  | 0.449379000000000 |
| 0.754608000000000  | 0.752789500000000  | 0.681563000000000 |
| 0.917651000000000  | 0.583501000000000  | 0.789933000000000 |
| 0.750455000000000  | 0.750278500000000  | 0.008002000000000 |
| 0.916405000000000  | 0.833140000000000  | 0.117283000000000 |
| 0.751729000000000  | 0.996518000000000  | 0.336122000000000 |
| 0.914293000000000  | 0.834181500000000  | 0.449311000000000 |
| 0.754630000000000  | 0.501812500000000  | 0.681602000000000 |
| 0.917623000000000  | 0.834195500000000  | 0.789917000000000 |
| 0.750458000000000  | 0.500174500000000  | 0.008002000000000 |
| 0.834878000000000  | 0.917421500000000  | 0.226956000000000 |
| 0.832477000000000  | 0.916230000000000  | 0.565456000000000 |
| 0.832979000000000  | 0.916491000000000  | 0.898766000000000 |
| 0.585100000000000  | 0.916089000000000  | 0.224876000000000 |
| 0.581927000000000  | 0.912833000000000  | 0.564400000000000 |
| 0.583283999999999  | 0.916533000000000  | 0.899399000000000 |
| 0.585098000000000  | 0.668988000000000  | 0.224869000000000 |
| 0.581831000000000  | 0.669132500000000  | 0.564386000000000 |
| 0.583261999999998  | 0.666743000000000  | 0.899410000000000 |
| 0.333260000000000  | 0.166629000000000  | 0.062512000000000 |
| 0.334074000000000  | 0.167044500000000  | 0.736115000000000 |
| -0.000001000000000 | 0.499989500000000  | 0.171560000000000 |
| 0.000046000000000  | 0.000035000000000  | 0.844795000000000 |
| 0.167423000000000  | 0.333705500000000  | 0.280292000000000 |
| 0.166632000000000  | 0.333316000000000  | 0.954028000000000 |
| 0.833408000000000  | 0.166704000000000  | 0.062368000000000 |
| 0.832562000000000  | 0.166288500000000  | 0.736151000000000 |
| 0.500011999999999  | -0.000004499999998 | 0.172238000000000 |
| 0.500037000000000  | 0.000028000000000  | 0.844194000000000 |
| 0.665938000000000  | 0.332954500000000  | 0.280308000000000 |
| 0.666761000000000  | 0.333381000000000  | 0.953896000000000 |
| 0.333260000000000  | 0.666629000000000  | 0.062512000000000 |
| 0.334074000000000  | 0.667044500000000  | 0.736115000000000 |
| -0.000001000000000 | 0.999989500000000  | 0.171560000000000 |
| 0.000046000000000  | 0.500035000000000  | 0.844795000000000 |
| 0.167423000000000  | 0.833705500000000  | 0.280292000000000 |
| 0.166632000000000  | 0.833316000000000  | 0.954028000000000 |



|                     |                    |                    |
|---------------------|--------------------|--------------------|
| 0.8334080000000002  | 0.6667040000000001 | 0.0623680000000000 |
| 0.8325620000000000  | 0.6662885000000002 | 0.7361510000000006 |
| 0.5000119999999999  | 0.4999955000000002 | 0.1722380000000002 |
| 0.5000370000000000  | 0.5000280000000000 | 0.8441940000000003 |
| 0.6659380000000001  | 0.8329545000000002 | 0.2803080000000002 |
| 0.6667610000000002  | 0.8333810000000000 | 0.9538960000000003 |
| 0.3328770000000001  | 0.1664560000000000 | 0.3924850000000002 |
| -0.0000039999999999 | 0.0000000000000002 | 0.5082440000000001 |
| 0.1664440000000001  | 0.3332020000000001 | 0.6237580000000004 |
| 0.8335300000000001  | 0.1667840000000003 | 0.3927360000000001 |
| 0.4999700000000000  | 0.4999875000000002 | 0.5082570000000001 |
| 0.6671030000000002  | 0.3335345000000003 | 0.6239930000000002 |
| 0.3328770000000001  | 0.6664560000000001 | 0.3924850000000001 |
| -0.0000039999999999 | 0.5000000000000002 | 0.5082440000000001 |
| 0.1664440000000001  | 0.8332020000000001 | 0.6237580000000004 |
| 0.8335300000000001  | 0.6667840000000003 | 0.3927360000000001 |
| 0.4999700000000000  | 0.9999875000000001 | 0.5082570000000001 |
| 0.6671030000000002  | 0.8335345000000003 | 0.6239930000000002 |
| 0.8330300000000001  | 0.1664930000000002 | 0.5675200000000001 |
| 0.4987100000000000  | 0.4993605000000000 | 0.3344040000000002 |
| 0.6658570000000001  | 0.3329475000000002 | 0.4483950000000000 |
| 0.3341580000000001  | 0.1670585000000001 | 0.5680920000000003 |
| 0.5013129999999999  | 0.5006505000000001 | 0.6820740000000005 |
| 0.1669730000000000  | 0.8335065000000002 | 0.4489660000000001 |
| 0.8330300000000001  | 0.6664930000000002 | 0.5675200000000001 |
| 0.6658570000000001  | 0.8329475000000002 | 0.4483950000000000 |
| 0.5013129999999999  | 0.0006505000000001 | 0.6820740000000004 |
| 0.1669730000000000  | 0.3335065000000002 | 0.4489660000000002 |
| 0.3351530000000000  | 0.1675550000000000 | 0.2253180000000001 |
| 0.3344610000000001  | 0.1672375000000001 | 0.8990710000000005 |
| 0.0013920000000000  | 0.0006955000000000 | 0.3333950000000002 |
| 0.9986370000000000  | 0.4993220000000000 | 0.6830650000000003 |
| 0.0000180000000000  | 0.0000095000000000 | 0.0082150000000000 |
| 0.1678160000000000  | 0.3339015000000002 | 0.1173260000000001 |
| 0.1685710000000000  | 0.3343025000000002 | 0.7917780000000005 |
| 0.8314390000000000  | 0.1657025000000000 | 0.2246510000000001 |
| 0.8322670000000000  | 0.1661400000000001 | 0.8990440000000006 |
| 0.5000090000000000  | 0.0000050000000000 | 0.0081990000000000 |
| 0.6655520000000000  | 0.3327680000000000 | 0.1173220000000001 |
| 0.6648740000000002  | 0.3324590000000001 | 0.7911250000000002 |
| 0.4987100000000000  | 0.9993605000000001 | 0.3344040000000002 |
| 0.3351530000000000  | 0.6675550000000000 | 0.2253180000000001 |
| 0.3344610000000001  | 0.6672375000000000 | 0.8990710000000004 |
| 0.9986370000000000  | 0.5006955000000000 | 0.3333950000000003 |
| 0.9986370000000000  | 0.9993220000000000 | 0.6830650000000003 |
| 0.0000180000000000  | 0.5000095000000000 | 0.0082150000000000 |
| 0.1678160000000000  | 0.8339015000000001 | 0.1173260000000001 |
| 0.1685710000000000  | 0.8343025000000002 | 0.7917780000000003 |
| 0.8314390000000000  | 0.6657025000000001 | 0.2246510000000001 |
| 0.8322670000000000  | 0.6661400000000001 | 0.8990440000000004 |
| 0.3341580000000001  | 0.6670585000000001 | 0.5680920000000003 |
| 0.5000090000000000  | 0.5000050000000000 | 0.0081990000000000 |
| 0.6655520000000000  | 0.8327680000000001 | 0.1173220000000001 |
| 0.6648740000000002  | 0.8324590000000001 | 0.7911250000000002 |

**File. S14.** The input POSCAR of the n-type LAO/STO (111) HS with Sr $\leftrightarrow$ La intermixing.

```
SYSTEM = LAOSTO
ENCUT = 500
ISTART = 0
ICHARG = 2
ISMEAR = 0
SIGMA = 0.1
NSW = 500
IBRION = 1
POTIM = 0.2
ISIF = 3
EDIFF = 1E-5
EDIFFG = -0.01
PREC = Accurate
LPLANE = .TRUE.
LSCALU = .FALSE.
NSIM = 4
ALGO = FAST
NPAR = 2
LDAUU = 0 0 5 0 11
LDAUJ = 0 0 0.64 0 0.68
LDAU = .TRUE.
LDAUTYPE = 2
LDAUL = -1 -1 2 -1 3
ISYM = 0
ISPIN = 2
MAGMOM = 132*0 -3 3 3 3 -3 -3 -3 3 3 3 -3 -3 36*0
VOSKOWN = 1
LORBIT = 11
LMAXMIX = 6
#LWAVE = .FALSE.
#LCHARG = .FALSE.
LREAL = A
```

**File. S15.** The INCAR file for structural optimization of the n-type LAO/STO (111) HS with Sr $\leftrightarrow$ La intermixing.

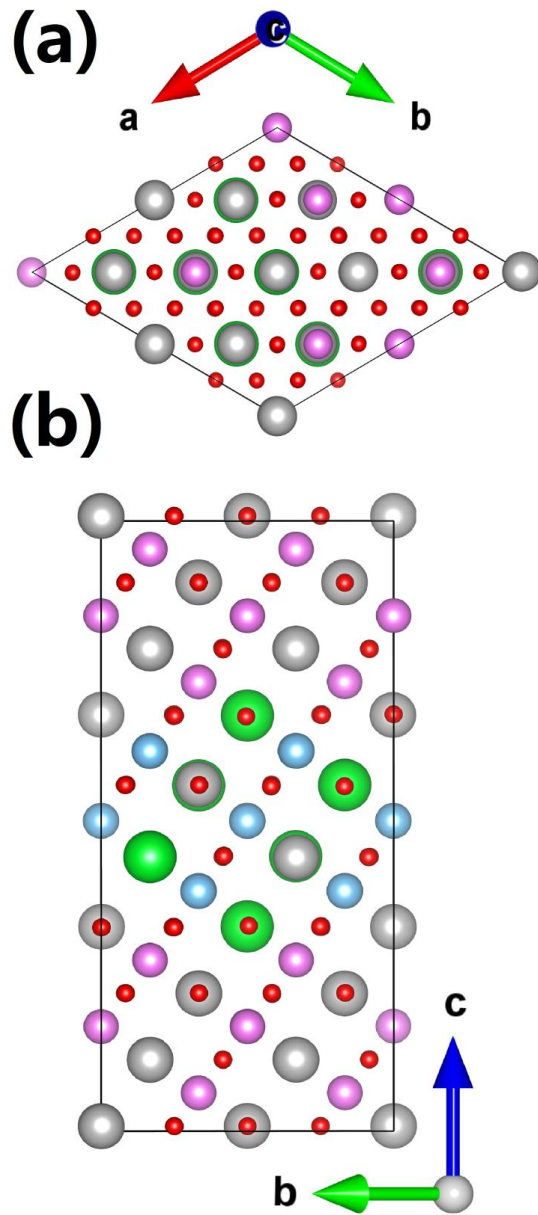

**Fig. S16.** The output geometry of the n-type LAO/STO (111) HS with Sr $\leftrightarrow$ La intermixing.
